# Supplementary material
Source: HighWire-hosted journal article supplement (https://oem.bmj.com/content/76/5/309)
Supplement: inline-supplementary-material-1 [file u003dtrue]

## Supplementary Tables S1. Odds Ratios (OR) and 95% CIs for Occupation Categories

| Occupation                                                       | Number (Cases/Controls) | OR              |
|------------------------------------------------------------------|-------------------------|-----------------|
| <b>0-Response Outside Scope</b>                                  | 92/210                  | 0.86[0.63-1.19] |
| 00001-student                                                    | 30/61                   | 0.97[0.59-1.60] |
| 00002-housewife/husband                                          | 42/107                  | 0.89[0.57-1.40] |
| 00003-unemployed                                                 | 14/27                   | 0.93[0.47-1.85] |
| 00004-retired                                                    | 14/35                   | 0.89[0.46-1.73] |
| 00006-overseas / travelling                                      | 13/28                   | 0.80[0.40-1.61] |
| 00008-held various odd jobs, that can not be coded individually  | 6/8                     | 1.31[0.44-3.89] |
| 00009-Volunteer                                                  | 1/9                     | 0.25[0.03-2.04] |
| <b>1-Legislators, Administrators and Managers</b>                | 84/169                  | 0.83[0.60-1.14] |
| 11-Legislators and Administrators                                | 5/17                    | 0.52[0.18-1.45] |
| 113-Senior Business Administrators                               | 5/9                     | 0.89[0.28-2.77] |
| 1131-Senior Business Administrators                              | 5/9                     | 0.89[0.28-2.77] |
| 11311-Chief Executive and/or Managing Director                   | 5/9                     | 0.89[0.28-2.77] |
| 12-Corporate Managers                                            | 82/158                  | 0.89[0.64-1.23] |
| 121-General Managers                                             | 8/19                    | 0.64[0.27-1.52] |
| 1211-General Managers                                            | 8/19                    | 0.64[0.27-1.52] |
| 12111-General Manager                                            | 8/19                    | 0.64[0.27-1.52] |
| 122-Specialised Managers                                         | 79/148                  | 0.94[0.68-1.31] |
| 1221-Production and Operation Managers                           | 23/39                   | 1.04[0.59-1.83] |
| 12211-Senior Education Manager                                   | 6/16                    | 0.90[0.34-2.43] |
| 12213-Production Manager (Manufacturing)                         | 6/15                    | 0.61[0.22-1.65] |
| 1222-Finance and Administration Managers                         | 17/35                   | 0.87[0.47-1.60] |
| 12222-Administration Manager                                     | 7/18                    | 0.82[0.33-2.04] |
| 12224-Finance Manager                                            | 7/15                    | 0.79[0.31-1.99] |
| 1224-Sales and Marketing Managers                                | 12/14                   | 1.35[0.60-3.05] |
| 12241-Sales and/or Marketing Manager                             | 12/14                   | 1.35[0.60-3.05] |
| 1226-Supply and Distribution Managers                            | 32/61                   | 0.99[0.62-1.58] |
| 12263-Retail Manager                                             | 10/28                   | 0.72[0.34-1.53] |
| 12264-Hotel or Motel Manager                                     | 11/16                   | 1.22[0.54-2.75] |
| 12266-Other Lodging Services Manager                             | 4/8                     | 1.04[0.30-3.60] |
| 12267-Other Catering Services Manager                            | 2/9                     | 0.45[0.09-2.17] |
| 1229-Other Specialised Managers                                  | 6/19                    | 0.66[0.26-1.70] |
| 12291-Office Manager                                             | 6/19                    | 0.66[0.26-1.70] |
| <b>2-Professionals</b>                                           | 109/254                 | 0.75[0.54-1.05] |
| 21-Physical, Mathematical and Engineering Science Professionals  | 30/47                   | 1.11[0.66-1.85] |
| 211-Physicists, Chemists and Related Professionals               | 3/7                     | 0.81[0.20-3.27] |
| 213-Computing Professionals                                      | 8/14                    | 0.90[0.36-2.22] |
| 2131-Computing Professionals                                     | 8/14                    | 0.90[0.36-2.22] |
| 21311-Systems Analyst                                            | 4/7                     | 0.87[0.25-3.10] |
| 21313-Systems Manager                                            | 2/8                     | 0.36[0.07-1.77] |
| 214-Architects, Engineers and Related Professionals              | 21/29                   | 1.31[0.71-2.43] |
| 2142-Civil Engineers                                             | 8/10                    | 1.21[0.45-3.21] |
| 2145-Mechanical Engineers                                        | 4/11                    | 0.65[0.20-2.15] |
| 21455-Other Mechanical Engineer                                  | 3/8                     | 0.64[0.16-2.52] |
| 22-Life Science and Health Professionals                         | 25/74                   | 0.70[0.42-1.15] |
| 221-Life Science Professionals                                   | 8/17                    | 0.94[0.38-2.31] |
| 2211-Biologists, Botanists, Zoologists and Related Professionals | 1/10                    | 0.21[0.03-1.74] |
| 2213-Agricultural and Natural Resource Scientists                | 5/8                     | 1.21[0.37-3.91] |
| 222-Health Professionals (Except Nursing)                        | 5/13                    | 0.84[0.28-2.52] |
| 223-Nursing and Midwifery Professionals                          | 13/47                   | 0.58[0.30-1.14] |
| 2231-Nursing and Midwifery Professionals                         | 13/47                   | 0.58[0.30-1.14] |
| 22312-Registered Nurse                                           | 12/43                   | 0.59[0.29-1.18] |
| 23-Teaching Professionals                                        | 34/98                   | 0.76[0.48-1.20] |
| 231-Tertiary Teaching Professionals                              | 9/24                    | 0.77[0.34-1.73] |
| 2311-Tertiary Teaching Professionals                             | 9/24                    | 0.77[0.34-1.73] |
| 23111-University and Higher Education Lecturer and/or Tutor      | 9/24                    | 0.77[0.34-1.73] |
| 232-Secondary Teaching Professionals                             | 9/41                    | 0.50[0.23-1.07] |
| 2321-Secondary Teaching Professionals                            | 9/41                    | 0.50[0.23-1.07] |
| 23211-Secondary School Teacher                                   | 9/41                    | 0.50[0.23-1.07] |
| 233-Primary and Early Childhood Teaching Professionals           | 20/49                   | 1.00[0.56-1.78] |

|                                                                        |                |                        |
|------------------------------------------------------------------------|----------------|------------------------|
| 2331-Primary Teaching Professionals                                    | 15/43          | 0.84[0.44-1.60]        |
| 23311-Primary School Teacher                                           | 15/43          | 0.84[0.44-1.60]        |
| 2332-Early Childhood Teaching Professionals                            | 5/8            | 1.47[0.46-4.72]        |
| 23321-Early Childhood Teacher                                          | 5/7            | 1.66[0.50-5.51]        |
| 234-Special Education Teaching Professionals                           | 2/12           | 0.42[0.09-1.96]        |
| 2341-Special Education Teaching Professionals                          | 2/12           | 0.42[0.09-1.96]        |
| 23411-Special Education Teacher                                        | 2/9            | 0.52[0.11-2.51]        |
| 24-Other Professionals                                                 | 33/74          | 0.84[0.53-1.32]        |
| 241-Business Professionals                                             | 17/46          | 0.63[0.35-1.12]        |
| 2411-Accountants                                                       | 8/30           | 0.46[0.20-1.02]        |
| 24111-Accountant                                                       | 7/26           | 0.47[0.20-1.12]        |
| 2412-Human Resources Professionals                                     | 6/4            | 3.07[0.84-11.26]       |
| 2413-Other Business Professionals                                      | 5/14           | 0.55[0.19-1.58]        |
| 242-Legal Professionals                                                | 3/7            | 0.83[0.20-3.38]        |
| 243-Archivists, Librarians and Related Information Professionals       | 6/12           | 1.23[0.44-3.42]        |
| 2432-Librarians and Related Information Professionals                  | 6/11           | 1.31[0.47-3.70]        |
| 24321-Librarian                                                        | 6/11           | 1.31[0.47-3.70]        |
| 244-Social and Related Science Professionals                           | 6/9            | 1.42[0.48-4.16]        |
| <b>3-Technicians and Associate Professionals</b>                       | <b>103/197</b> | <b>0.97[0.72-1.32]</b> |
| 31-Physical Science and Engineering Associate Professionals            | 42/65          | 1.20[0.78-1.85]        |
| 311-Physical Science and Engineering Technicians                       | 28/35          | 1.69[0.98-2.91]        |
| 3111-Physical Science Technicians                                      | 3/7            | 1.21[0.30-4.91]        |
| 31111-Physical Science Technician                                      | 3/7            | 1.21[0.30-4.91]        |
| 3114-Electronic Engineering Technicians                                | 10/9           | 2.09[0.81-5.38]        |
| 31141-Telecommunications Technician                                    | 8/4            | 4.20[1.20-14.64]       |
| 3118-Draughting Technicians                                            | 9/7            | 3.02[1.07-8.53]        |
| 31181-Draughting Technician                                            | 9/7            | 3.02[1.07-8.53]        |
| 312-Computer Equipment Controllers                                     | 7/6            | 1.77[0.57-5.47]        |
| 3121-Computer Equipment Controllers                                    | 7/6            | 1.77[0.57-5.47]        |
| 313-Optical and Electronic Equipment Controllers                       | 4/8            | 0.89[0.26-3.04]        |
| 315-Safety and Health Inspectors                                       | 2/13           | 0.24[0.05-1.11]        |
| 3151-Safety and Health Inspectors                                      | 2/13           | 0.24[0.05-1.11]        |
| 32-Life Science and Health Associate Professionals                     | 14/24          | 1.11[0.55-2.23]        |
| 321-Life Science Technicians and Related Workers                       | 6/11           | 0.93[0.33-2.60]        |
| 3211-Life Science Technicians                                          | 2/11           | 0.30[0.06-1.40]        |
| 322-Health Associate Professionals                                     | 7/12           | 1.25[0.47-3.34]        |
| 33-Other Associate Professionals                                       | 61/129         | 0.88[0.62-1.25]        |
| 331-Finance and Sales Associate Professionals                          | 35/53          | 1.15[0.72-1.84]        |
| 3312-Insurance Representative                                          | 8/7            | 2.34[0.81-6.73]        |
| 33121-Insurance Representative                                         | 8/7            | 2.34[0.81-6.73]        |
| 3313-Real Estate Agents                                                | 6/10           | 1.14[0.40-3.27]        |
| 33131-Real Estate Agent/Property Consultant                            | 5/10           | 0.97[0.32-2.94]        |
| 3315-Sales Representatives                                             | 15/29          | 0.83[0.43-1.62]        |
| 33152-Technical Representative                                         | 5/10           | 0.94[0.31-2.90]        |
| 33153-Sales Representative                                             | 11/16          | 1.03[0.46-2.32]        |
| 332-Administrative Associate Professionals                             | 8/19           | 0.82[0.35-1.92]        |
| 3321-Administrative and Related Associate Professionals                | 4/10           | 0.73[0.22-2.42]        |
| 33211-Administration Officer                                           | 3/8            | 0.70[0.18-2.77]        |
| 334-Social Work Associate Professionals                                | 8/32           | 0.56[0.25-1.28]        |
| 3341-Social Work Associate Professionals                               | 6/12           | 1.20[0.42-3.43]        |
| 33411-Social Worker                                                    | 5/10           | 1.32[0.42-4.14]        |
| 3342-Education Associate Professionals                                 | 2/20           | 0.23[0.05-1.00]        |
| 33422-Teacher Aide                                                     | 2/19           | 0.24[0.05-1.05]        |
| 336-Writers, Artists, Entertainment and Sports Associate Professionals | 15/34          | 0.82[0.43-1.55]        |
| 3361-Authors, Journalists and Other Writers                            | 1/12           | 0.17[0.02-1.36]        |
| 3369-Sportspersons and Related Workers                                 | 4/7            | 0.89[0.25-3.13]        |
| <b>4-Clerks</b>                                                        | <b>90/238</b>  | <b>0.62[0.45-0.86]</b> |
| 41-Office Clerks                                                       | 82/204         | 0.70[0.51-0.98]        |
| 411-Secretaries and Keyboard Operating Clerks                          | 27/60          | 1.03[0.61-1.72]        |
| 4111-Typists and Word Processor Operators                              | 9/23           | 1.10[0.48-2.51]        |
| 41111-Typist and Word Processor Operator                               | 9/23           | 1.10[0.48-2.51]        |
| 4112-Data Entry Operators                                              | 4/6            | 1.40[0.37-5.23]        |
| 41121-Data Entry Operator                                              | 4/6            | 1.40[0.37-5.23]        |

|                                                          |                |                        |
|----------------------------------------------------------|----------------|------------------------|
| 4114-Secretaries                                         | 15/39          | 0.79[0.41-1.49]        |
| 41141-Secretary                                          | 15/39          | 0.79[0.41-1.49]        |
| 412-Numerical Clerks                                     | 16/31          | 0.98[0.52-1.85]        |
| 4121-Accounting and Bookkeeping Clerks                   | 12/23          | 1.04[0.50-2.17]        |
| 41211-Accounts Clerk                                     | 10/17          | 1.24[0.54-2.83]        |
| 4122-Statistical and Finance Clerks                      | 6/8            | 1.40[0.46-4.24]        |
| 41221-Finance Clerk                                      | 4/7            | 1.02[0.28-3.63]        |
| 413-Material Recording and Transport Clerks              | 10/22          | 0.72[0.33-1.58]        |
| 4131-Stock Clerks                                        | 8/19           | 0.69[0.29-1.65]        |
| 41311-Stock Clerk                                        | 3/16           | 0.29[0.08-1.02]        |
| 414-Library, Mail and Related Clerks                     | 52/139         | 0.67[0.46-0.98]        |
| 4142-Mail Carriers and Sorting Clerks                    | 11/11          | 1.70[0.71-4.05]        |
| 4144-Office Clerks                                       | 42/129         | 0.58[0.39-0.86]        |
| 41443-General Clerk                                      | 33/121         | 0.48[0.31-0.73]        |
| 41445-Human Resources Clerk                              | 3/8            | 0.75[0.19-3.00]        |
| 42-Customer Services Clerks                              | 29/75          | 0.79[0.49-1.29]        |
| 421-Cashiers, Tellers and Related Clerks                 | 14/42          | 0.65[0.34-1.23]        |
| 4211-Cashiers and Ticket Issuers                         | 5/16           | 0.60[0.21-1.72]        |
| 42111-Cashier                                            | 4/12           | 0.64[0.20-2.10]        |
| 4212-Bank Officers                                       | 10/29          | 0.68[0.32-1.45]        |
| 42121-Bank Officer                                       | 10/29          | 0.68[0.32-1.45]        |
| 422-Client Information Clerks                            | 17/39          | 0.99[0.53-1.85]        |
| 4221-Receptionists and Information Clerks                | 12/23          | 1.16[0.55-2.46]        |
| 42213-Information Clerk and Other Receptionist           | 10/20          | 1.19[0.53-2.69]        |
| 4222-Telephone Switchboard Operators                     | 6/17           | 0.84[0.31-2.24]        |
| 42221-Telephone Switchboard Operator                     | 6/17           | 0.84[0.31-2.24]        |
| <b>5-Service and Sales Workers</b>                       | <b>130/205</b> | <b>1.40[1.04-1.90]</b> |
| 51-Personal and Protective Services Workers              | 89/131         | 1.46[1.04-2.04]        |
| 512-Housekeeping and Restaurant Services Workers         | 36/63          | 1.08[0.68-1.72]        |
| 5121-Housekeepers                                        | 5/12           | 0.88[0.29-2.64]        |
| 51212-Housekeeper (Not Private)                          | 3/8            | 0.68[0.17-2.70]        |
| 5122-Cooks                                               | 9/20           | 0.86[0.37-1.96]        |
| 51222-Cook                                               | 7/14           | 1.07[0.41-2.77]        |
| 5123-Waiters and Bartenders                              | 26/44          | 1.12[0.65-1.91]        |
| 51231-Bartender                                          | 8/10           | 1.11[0.42-2.95]        |
| 51233-Waiter                                             | 9/17           | 1.17[0.49-2.79]        |
| 51234-Catering Counter Assistant                         | 5/11           | 0.94[0.31-2.83]        |
| 51235-Kitchenhand                                        | 8/7            | 2.51[0.87-7.21]        |
| 513-Personal Care Workers                                | 18/38          | 1.06[0.58-1.96]        |
| 5131-Personal Care Workers                               | 18/38          | 1.06[0.58-1.96]        |
| 51314-Nurse Aide                                         | 4/15           | 0.67[0.21-2.10]        |
| 51316-Care Giver                                         | 11/13          | 2.02[0.85-4.77]        |
| 514-Other Personal Services Workers                      | 12/17          | 1.75[0.78-3.92]        |
| 5141-Hairdressers, Beauty Therapists and Related Workers | 5/6            | 1.67[0.47-5.92]        |
| 5142-Child Care Workers                                  | 8/12           | 1.83[0.70-4.77]        |
| 51421-Child Care Worker                                  | 8/12           | 1.83[0.70-4.77]        |
| 515-Protective Services Workers                          | 28/33          | 1.45[0.84-2.50]        |
| 5152-Police                                              | 7/13           | 0.93[0.36-2.39]        |
| 51522-Police Officer                                     | 7/13           | 0.93[0.36-2.39]        |
| 5154-Other Protective Services Workers                   | 6/5            | 2.07[0.58-7.37]        |
| 51542-Security Officer                                   | 6/4            | 2.47[0.63-9.63]        |
| 5155-Armed Forces                                        | 13/13          | 1.77[0.79-3.99]        |
| 51551-Armed Forces                                       | 13/13          | 1.77[0.79-3.99]        |
| 52-Salespersons, Demonstrators and Models                | 66/110         | 1.22[0.85-1.77]        |
| 521-Salespersons and Demonstrators                       | 62/108         | 1.17[0.80-1.70]        |
| 5211-Salespersons and Demonstrators                      | 62/108         | 1.17[0.80-1.70]        |
| 52111-Sales Assistant                                    | 57/106         | 1.09[0.74-1.60]        |
| 52113-Forecourt Attendant                                | 11/2           | 8.31[1.79-38.54]       |
| <b>6-Agriculture and Fishery Workers</b>                 | <b>106/144</b> | <b>1.66[1.21-2.29]</b> |
| 61-Market Oriented Agricultural and Fishery Workers      | 106/144        | 1.66[1.21-2.29]        |
| 611-Market Farmers and Crop Growers                      | 47/46          | 2.15[1.37-3.38]        |
| 6111-Field Crop and Vegetable Growers                    | 11/8           | 2.93[1.10-7.77]        |
| 61112-Market Gardener and Related Worker                 | 8/4            | 3.98[1.14-13.88]       |

|                                                                |               |                        |
|----------------------------------------------------------------|---------------|------------------------|
| 6112-Fruit Growers                                             | 23/24         | 2.03[1.09-3.78]        |
| 61121-Fruit Grower, Worker                                     | 20/21         | 2.07[1.07-4.02]        |
| 6113-Gardeners and Nursery Growers                             | 20/19         | 1.96[1.01-3.82]        |
| 61131-Nursery Grower, Nursery Worker                           | 7/8           | 1.87[0.65-5.39]        |
| 61133-Grounds or Green Keeper                                  | 12/7          | 3.01[1.14-7.96]        |
| 612-Market Oriented Animal Producers                           | 64/106        | 1.19[0.82-1.73]        |
| 6121-Livestock Producers                                       | 42/73         | 1.10[0.72-1.69]        |
| 61211-Dairy Farmer, Dairy Farm Worker                          | 27/45         | 1.09[0.65-1.84]        |
| 61212-Sheep Farmer, Sheep Farm Worker                          | 12/24         | 0.91[0.44-1.89]        |
| 6122-Mixed Livestock Producers                                 | 8/21          | 0.63[0.27-1.49]        |
| 61221-Mixed Livestock Farmer, Mixed Livestock Farm Worker      | 8/21          | 0.63[0.27-1.49]        |
| 6125-Crop and Livestock Producers                              | 14/10         | 3.61[1.44-9.02]        |
| 61251-Crop and Livestock Farmer, Worker                        | 14/10         | 3.61[1.44-9.02]        |
| 6126-Other Agriculture Workers                                 | 11/16         | 1.03[0.46-2.33]        |
| 613-Forestry and Related Workers                               | 3/8           | 0.69[0.18-2.75]        |
| 6131-Forestry Workers and Loggers                              | 3/8           | 0.69[0.18-2.75]        |
| 614-Fishery Workers, Hunters and Trappers                      | 7/3           | 5.62[1.27-24.97]       |
| <b>7-Trades Workers</b>                                        | <b>93/128</b> | <b>1.28[0.89-1.83]</b> |
| 71-Building Trades Workers                                     | 57/49         | 2.02[1.30-3.14]        |
| 711-Building Frame and Related Trades Workers                  | 33/27         | 1.93[1.10-3.39]        |
| 7112-Carpenters and Joiners                                    | 32/25         | 1.97[1.11-3.48]        |
| 71121-Carpenter and/or Joiner                                  | 12/12         | 1.32[0.56-3.09]        |
| 71122-Builder (Including Contractor)                           | 23/13         | 2.90[1.41-5.96]        |
| 712-Building Finishers and Related Trades Workers              | 14/17         | 1.20[0.57-2.53]        |
| 7124-Painters and Paperhangers                                 | 8/10          | 1.13[0.43-2.96]        |
| 71241-Painter, Decorator and/or Paperhanger                    | 6/8           | 1.07[0.36-3.21]        |
| 713-Electricians                                               | 16/8          | 3.21[1.32-7.79]        |
| 7131-Electricians                                              | 16/8          | 3.21[1.32-7.79]        |
| 71311-Electrician                                              | 14/6          | 3.61[1.34-9.74]        |
| 72-Metal and Machinery Trades Workers                          | 29/51         | 0.88[0.52-1.49]        |
| 721-Metal Moulders, Sheet-Metal and Related Workers            | 8/11          | 1.07[0.41-2.80]        |
| 7212-Sheet-Metal Workers                                       | 8/11          | 1.07[0.41-2.80]        |
| 72124-Fitter and Welder                                        | 8/8           | 1.44[0.51-4.05]        |
| 722-Blacksmiths, Toolmakers and Related Workers                | 5/7           | 1.46[0.43-4.93]        |
| 723-Machinery Mechanics and Fitters                            | 21/35         | 0.91[0.50-1.67]        |
| 7231-Machinery Mechanics and Fitters                           | 21/35         | 0.91[0.50-1.67]        |
| 72311-Machinery Mechanic                                       | 7/18          | 0.56[0.22-1.42]        |
| 72312-Motor Mechanic                                           | 12/16         | 1.03[0.46-2.29]        |
| 724-Electrical and Electronic Instrument Mechanics and Fitters | 2/8           | 0.39[0.08-1.90]        |
| 73-Precision Trades Workers                                    | 6/15          | 0.67[0.25-1.81]        |
| 733-Printing Trades Workers                                    | 3/13          | 0.43[0.12-1.56]        |
| 7331-Printing Trades Workers                                   | 1/12          | 0.16[0.02-1.29]        |
| 74-Other Craft and Related Trades Workers                      | 7/26          | 0.49[0.21-1.17]        |
| 741-Food and Related Products Processing Trades Workers        | 1/10          | 0.15[0.02-1.19]        |
| 743-Tailors and Dressmakers                                    | 4/13          | 0.70[0.22-2.22]        |
| <b>8-Plant and Machine Operators and Assemblers</b>            | <b>92/120</b> | <b>1.42[1.01-2.01]</b> |
| 81-Industrial Plant Operators                                  | 20/26         | 1.19[0.63-2.25]        |
| 811-Mining and Mineral Processing Plant Operators              | 6/7           | 1.18[0.38-3.65]        |
| 8111-Mining Plant Operators                                    | 4/6           | 0.89[0.24-3.30]        |
| 812-Metal-Processing Plant Operators                           | 8/11          | 1.12[0.43-2.94]        |
| 814-Wood-Processing and Papermaking Plant Operators            | 7/5           | 2.57[0.78-8.43]        |
| 82-Stationary Machine Operators and Assemblers                 | 48/64         | 1.27[0.83-1.94]        |
| 821-Metal and Mineral Products Processing Machine Operators    | 7/4           | 2.68[0.73-9.82]        |
| 826-Textile Products Machine Operators                         | 10/19         | 1.23[0.53-2.82]        |
| 8263-Sewing and Embroidering Machine Operators                 | 4/13          | 0.75[0.23-2.45]        |
| 82631-Sewing Machinist                                         | 4/13          | 0.75[0.23-2.45]        |
| 827-Food and Related Products Processing Machine Operators     | 12/16         | 1.09[0.49-2.38]        |
| 8271-Meat and Fish Processing Machine Operators                | 6/9           | 0.93[0.32-2.71]        |
| 829-Assemblers                                                 | 14/20         | 1.03[0.50-2.12]        |
| 8292-Electrical Machinery Assemblers                           | 6/9           | 1.04[0.35-3.07]        |
| 82923-Linesperson                                              | 4/7           | 0.88[0.24-3.23]        |
| 8294-Wood and Related Materials Products Assemblers            | 4/6           | 0.85[0.23-3.16]        |
| 83-Drivers and Mobile Machinery Operators                      | 37/50         | 1.31[0.80-2.14]        |

|                                                                           |               |                        |
|---------------------------------------------------------------------------|---------------|------------------------|
| 832-Motor Vehicle Drivers                                                 | 22/32         | 1.22[0.67-2.23]        |
| 8321-Car, Taxi and Light Van Drivers                                      | 6/7           | 1.21[0.39-3.78]        |
| 8323-Heavy Truck Drivers                                                  | 15/24         | 1.14[0.56-2.33]        |
| 83231-Heavy Truck or Tanker Driver                                        | 15/24         | 1.14[0.56-2.33]        |
| 833-Agricultural, Earthmoving and Other Materials-Handling Equipment Oper | 14/15         | 1.59[0.72-3.50]        |
| 8331-Motorised Farm Machinery Operators                                   | 3/7           | 0.92[0.22-3.91]        |
| 8332-Earthmoving and Related Machinery Operators                          | 8/8           | 1.43[0.51-3.99]        |
| 83324-Earthmoving Machine Operator                                        | 6/5           | 1.97[0.58-6.76]        |
| 834-Ships' Deck Crews and Related Workers                                 | 6/9           | 1.44[0.47-4.38]        |
| 8341-Ships' Deck Crews and Related Workers                                | 6/9           | 1.44[0.47-4.38]        |
| 83411-Deck Rating                                                         | 4/9           | 1.03[0.29-3.61]        |
| 84-Building and Related Workers                                           | 5/6           | 1.19[0.34-4.12]        |
| 841-Building and Related Workers                                          | 5/6           | 1.19[0.34-4.12]        |
| 8411-Building and Related Workers                                         | 5/5           | 1.33[0.37-4.84]        |
| <b>9-Elementary Occupations (incl Residuals)</b>                          | <b>80/111</b> | <b>1.44[1.01-2.04]</b> |
| 91-Labourers and Related Elementary Service Workers                       | 78/110        | 1.39[0.98-1.98]        |
| 911-Building Caretakers and Cleaners                                      | 19/35         | 1.18[0.64-2.18]        |
| 9111-Caretakers and Cleaners                                              | 19/35         | 1.18[0.64-2.18]        |
| 91111-Cleaner                                                             | 17/28         | 1.30[0.68-2.51]        |
| 91112-Building Caretaker                                                  | 4/7           | 1.29[0.35-4.74]        |
| 912-Messengers and Doorkeepers                                            | 5/12          | 0.73[0.25-2.18]        |
| 9121-Messengers and Doorkeepers                                           | 5/12          | 0.73[0.25-2.18]        |
| 91211-Courier and Deliverer                                               | 5/11          | 0.81[0.27-2.43]        |
| 914-Packers and Freight Handlers                                          | 12/29         | 0.65[0.32-1.32]        |
| 9141-Packers and Freight Handlers                                         | 12/29         | 0.65[0.32-1.32]        |
| 91411-Packer                                                              | 7/13          | 1.02[0.39-2.67]        |
| 91412-Loader and/or Checker                                               | 5/16          | 0.44[0.16-1.25]        |
| 915-Labourers                                                             | 48/55         | 1.61[1.03-2.52]        |
| 9151-Labourers                                                            | 48/55         | 1.61[1.03-2.52]        |
| 91512-Builder's Labourer                                                  | 8/5           | 2.94[0.91-9.49]        |
| 91513-Sawmill Labourer                                                    | 5/6           | 1.28[0.38-4.38]        |
| 91514-General Labourer                                                    | 39/46         | 1.49[0.92-2.42]        |

---

OR adjusted for Age, Sex, Ethnicity, Highest Education Level, Socioeconomic Deprivation Status and Smoking.

Results were based on at least 10 subjects ( cases + controls).

"Response outside scope" was used for responses, such as 'housewife', 'pensioner' or 'student', which are not covered by NZSCO99.

## Supplementary Tables S2. Odds Ratios (OR) and 95% CIs for Industry Categories

| Industry                                                           | Number (Cases/Controls) | OR               |
|--------------------------------------------------------------------|-------------------------|------------------|
| <b>0-Response Outside Scope</b>                                    | 91/203                  | 0.90[0.65-1.24]  |
| 00001-Student                                                      | 23/56                   | 0.79[0.46-1.36]  |
| 00002-Housewife/husband                                            | 42/107                  | 0.89[0.57-1.40]  |
| 00003-Unemployed                                                   | 14/25                   | 1.05[0.53-2.09]  |
| 00004-Retired                                                      | 14/36                   | 0.87[0.45-1.70]  |
| 00006-Overseas / travelling                                        | 13/27                   | 0.81[0.40-1.64]  |
| 00008-Held various odd jobs, that can not be coded individually    | 6/10                    | 1.00[0.35-2.83]  |
| <b>A-Agriculture, Forestry and Fishing</b>                         | 101/149                 | 1.42[1.03-1.96]  |
| A01-Agriculture                                                    | 92/123                  | 1.68[1.20-2.35]  |
| A011-Horticulture and Fruit Growing                                | 36/40                   | 1.93[1.18-3.18]  |
| A0111-Plant Nurseries                                              | 5/5                     | 1.66[0.45-6.06]  |
| A0113-Vegetable Growing                                            | 8/7                     | 2.62[0.89-7.76]  |
| A0119-Fruit Growing nec                                            | 20/13                   | 3.67[1.71-7.89]  |
| A012-Grain, Sheep and Beef Cattle Farming                          | 34/44                   | 1.50[0.91-2.46]  |
| A0123-Sheep-Beef Cattle Farming                                    | 21/26                   | 1.59[0.85-2.96]  |
| A0124-Sheep Farming                                                | 7/15                    | 0.82[0.32-2.10]  |
| A0125-Beef Cattle Farming                                          | 5/6                     | 1.48[0.43-5.11]  |
| A013-Dairy Cattle Farming                                          | 29/41                   | 1.40[0.83-2.36]  |
| A0130-Dairy Cattle Farming                                         | 29/41                   | 1.40[0.83-2.36]  |
| A015-Other Livestock Farming                                       | 12/17                   | 1.18[0.53-2.59]  |
| A0159-Livestock Farming nec                                        | 7/13                    | 0.94[0.35-2.52]  |
| A02-Services to Agriculture; Hunting and Trapping                  | 13/26                   | 0.89[0.44-1.81]  |
| A021-Services to Agriculture                                       | 13/24                   | 0.95[0.46-1.94]  |
| A0219-Services to Agriculture nec                                  | 8/22                    | 0.60[0.26-1.41]  |
| A03-Forestry and Logging                                           | 5/10                    | 0.77[0.25-2.37]  |
| A030-Forestry and Logging                                          | 5/10                    | 0.77[0.25-2.37]  |
| A04-Commercial Fishing                                             | 6/8                     | 1.33[0.44-4.04]  |
| A041-Marine Fishing                                                | 6/7                     | 1.55[0.49-4.89]  |
| <b>B-Mining</b>                                                    | 16/12                   | 2.26[1.03-4.97]  |
| B14-Other Mining                                                   | 7/4                     | 3.81[1.07-13.59] |
| <b>C-Manufacturing</b>                                             | 131/237                 | 0.99[0.74-1.32]  |
| C21-Food, Beverage and Tobacco                                     | 41/67                   | 1.12[0.73-1.71]  |
| C211-Meat and Meat Product Manufacturing                           | 20/29                   | 1.16[0.63-2.13]  |
| C2111-Meat Processing                                              | 20/27                   | 1.26[0.68-2.33]  |
| C212-Dairy Product Manufacturing                                   | 11/5                    | 4.98[1.64-15.06] |
| C2129-Dairy Product Manufacturing nec                              | 8/4                     | 4.10[1.16-14.45] |
| C217-Other Food Manufacturing                                      | 4/20                    | 0.40[0.13-1.21]  |
| C2179-Food Manufacturing nec                                       | 3/9                     | 0.63[0.16-2.42]  |
| C218-Beverage and Malt Manufacturing                               | 7/9                     | 1.30[0.47-3.60]  |
| C22-Textile, Clothing, Footwear and Leather Manufacturing          | 25/57                   | 0.93[0.56-1.56]  |
| C221-Textile Fibre, Yarn and Woven Fabric Manufacturing            | 9/13                    | 1.25[0.52-3.04]  |
| C2214-Wool Textile Manufacturing                                   | 6/10                    | 1.19[0.41-3.42]  |
| C222-Textile Product Manufacturing                                 | 4/8                     | 1.12[0.31-4.05]  |
| C224-Clothing Manufacturing                                        | 9/23                    | 1.10[0.48-2.54]  |
| C2240-Clothing Manufacturing                                       | 5/10                    | 1.20[0.39-3.73]  |
| C225-Footwear Manufacturing                                        | 1/10                    | 0.19[0.02-1.54]  |
| C23-Wood and Paper Product Manufacturing                           | 21/34                   | 1.14[0.63-2.04]  |
| C231-Log Sawmilling and Timber Dressing                            | 12/10                   | 2.12[0.87-5.19]  |
| C2311-Log Sawmilling                                               | 11/9                    | 1.99[0.79-4.99]  |
| C232-Other Wood Product Manufacturing                              | 3/9                     | 0.59[0.15-2.31]  |
| C233-Paper and Paper Product Manufacturing                         | 8/15                    | 1.05[0.43-2.56]  |
| C2331-Pulp, Paper and Paperboard Manufacturing                     | 6/13                    | 0.88[0.32-2.41]  |
| C24-Printing, Publishing and Recorded Media                        | 6/35                    | 0.31[0.13-0.75]  |
| C241-Printing and Services to Printing                             | 4/15                    | 0.42[0.13-1.31]  |
| C2412-Printing                                                     | 3/14                    | 0.36[0.10-1.30]  |
| C242-Publishing                                                    | 2/20                    | 0.20[0.05-0.88]  |
| C2421-Newspaper Printing or Publishing                             | 2/13                    | 0.32[0.07-1.49]  |
| C25-Petroleum, Coal, Chemical and Associated Product Manufacturing | 18/34                   | 0.97[0.53-1.78]  |
| C253-Basic Chemical Manufacturing                                  | 4/6                     | 1.19[0.32-4.44]  |
| C254-Other Chemical Product Manufacturing                          | 9/15                    | 1.09[0.46-2.59]  |

|                                                               |         |                 |
|---------------------------------------------------------------|---------|-----------------|
| C255-Rubber Product Manufacturing                             | 2/8     | 0.58[0.12-2.84] |
| C256-Plastic Product Manufacturing                            | 4/6     | 1.02[0.28-3.78] |
| C26-Non-Metallic Mineral Product Manufacturing                | 8/10    | 1.37[0.52-3.64] |
| C263-Cement, Lime, Plaster and Concrete Product Manufacturing | 6/5     | 2.11[0.62-7.19] |
| C27-Metal Product Manufacturing                               | 24/36   | 1.21[0.69-2.11] |
| C271-Iron and Steel Manufacturing                             | 7/14    | 0.85[0.33-2.21] |
| C2711-Basic Iron and Steel Manufacturing                      | 4/14    | 0.48[0.15-1.52] |
| C274-Structural Metal Product Manufacturing                   | 6/5     | 1.74[0.51-5.89] |
| C276-Fabricated Metal Product Manufacturing                   | 9/16    | 1.16[0.49-2.75] |
| C2769-Fabricated Metal Product Manufacturing nec              | 2/12    | 0.36[0.08-1.69] |
| C28-Machinery and Equipment Manufacturing                     | 27/47   | 0.91[0.54-1.53] |
| C281-Motor Vehicle and Part Manufacturing                     | 8/16    | 0.77[0.32-1.87] |
| C2811-Motor Vehicle Manufacturing                             | 6/13    | 0.74[0.27-2.03] |
| C282-Other Transport Equipment Manufacturing                  | 7/11    | 1.14[0.42-3.08] |
| C2822-Boatbuilding                                            | 3/8     | 0.66[0.17-2.65] |
| C285-Electrical Equipment and Appliance Manufacturing         | 3/10    | 0.59[0.15-2.22] |
| C286-Industrial Machinery and Equipment Manufacturing         | 10/15   | 1.11[0.48-2.60] |
| C2869-Industrial Machinery and Equipment Manufacturing nec    | 5/11    | 0.74[0.24-2.25] |
| C29-Other Manufacturing                                       | 9/17    | 0.79[0.34-1.85] |
| C292-Furniture Manufacturing                                  | 4/9     | 0.59[0.18-1.97] |
| C294-Other Manufacturing                                      | 5/8     | 1.08[0.33-3.52] |
| <b>D-Electricity, Gas and Water Supply</b>                    | 14/20   | 1.16[0.57-2.39] |
| D36-Electricity and Gas Supply                                | 14/20   | 1.16[0.57-2.39] |
| D361-Electricity Supply                                       | 13/16   | 1.40[0.65-3.00] |
| <b>E-Construction</b>                                         | 83/100  | 1.50[1.04-2.14] |
| E41-General Construction                                      | 53/50   | 1.81[1.16-2.82] |
| E411-Building Construction                                    | 40/43   | 1.47[0.91-2.38] |
| E4111-House Construction                                      | 31/30   | 1.59[0.92-2.76] |
| E4113-Non-Residential Building Construction                   | 7/5     | 1.98[0.60-6.47] |
| E412-Non-Building Construction                                | 16/11   | 2.36[1.05-5.29] |
| E4121-Road and Bridge Construction                            | 12/6    | 3.00[1.09-8.30] |
| E4122-Non-Building Construction nec                           | 4/6     | 1.06[0.28-3.99] |
| E42-Construction Trade Services                               | 46/63   | 1.23[0.80-1.90] |
| E421-Site Preparation Services                                | 6/5     | 1.62[0.47-5.55] |
| E4210-Site Preparation Services                               | 6/5     | 1.62[0.47-5.55] |
| E422-Building Structure Services                              | 4/6     | 1.04[0.27-3.95] |
| E423-Installation Trade Services                              | 19/20   | 1.53[0.78-2.98] |
| E4231-Plumbing Services                                       | 6/5     | 1.86[0.54-6.39] |
| E4232-Electrical Services                                     | 10/10   | 1.69[0.68-4.24] |
| E424-Building Completion Services                             | 18/31   | 1.04[0.56-1.93] |
| E4242-Carpentry Services                                      | 6/10    | 1.05[0.36-3.03] |
| E4244-Painting and Decorating Services                        | 7/13    | 0.89[0.34-2.29] |
| E425-Other Construction Services                              | 6/6     | 1.41[0.43-4.64] |
| <b>F-Wholesale Trade</b>                                      | 32/79   | 0.66[0.42-1.03] |
| F45-Basic Material Wholesaling                                | 13/39   | 0.54[0.28-1.05] |
| F451-Farm Produce Wholesaling                                 | 8/17    | 0.81[0.33-1.96] |
| F4519-Farm Produce and Supplies Wholesaling nec               | 6/10    | 1.00[0.35-2.90] |
| F453-Builders Supplies Wholesaling                            | 5/13    | 0.64[0.22-1.88] |
| F4539-Building Supplies Wholesaling nec                       | 3/8     | 0.66[0.17-2.59] |
| F46-Machinery and Motor Vehicle Wholesaling                   | 8/12    | 1.03[0.41-2.63] |
| F461-Machinery and Equipment Wholesaling                      | 6/9     | 0.98[0.33-2.89] |
| F47-Personal and Household Good Wholesaling                   | 12/39   | 0.54[0.27-1.06] |
| F471-Food, Drink and Tobacco Wholesaling                      | 4/20    | 0.35[0.12-1.06] |
| F4719-Grocery Wholesaling nec                                 | 3/7     | 0.84[0.21-3.39] |
| F479-Other Wholesaling                                        | 6/11    | 0.90[0.32-2.51] |
| <b>G-Retail Trade</b>                                         | 110/194 | 1.09[0.81-1.48] |
| G51-Food Retailing                                            | 32/66   | 0.95[0.60-1.52] |
| G511-Supermarket and Grocery Stores                           | 18/45   | 0.81[0.45-1.47] |
| G5110-Supermarket and Grocery Stores                          | 15/41   | 0.75[0.40-1.41] |
| G512-Specialised Food Retailing                               | 18/31   | 1.10[0.59-2.03] |
| G5124-Bread and Cake Retailing                                | 2/11    | 0.34[0.07-1.58] |
| G5125-Takeaway Food Retailing                                 | 7/8     | 1.78[0.61-5.20] |
| G52-Personal and Household Good Retailing                     | 57/111  | 0.97[0.67-1.41] |

|                                                        |        |                 |
|--------------------------------------------------------|--------|-----------------|
| G521-Department Stores                                 | 8/26   | 0.55[0.24-1.27] |
| G522-Clothing and Soft Good Retailing                  | 17/21  | 1.93[0.96-3.88] |
| G5221-Clothing Retailing                               | 9/12   | 1.79[0.71-4.50] |
| G523-Furniture, Houseware and Appliance Retailing      | 13/24  | 0.92[0.45-1.86] |
| G5233-Domestic Hardware and Houseware Retailing        | 3/10   | 0.43[0.11-1.63] |
| G5234-Domestic Appliance Retailing                     | 5/7    | 1.32[0.40-4.29] |
| G524-Recreational Good Retailing                       | 6/20   | 0.66[0.25-1.70] |
| G5243-Newspaper, Book and Stationery Retailing         | 5/13   | 0.89[0.30-2.61] |
| G525-Other Personal and Household Good Retailing       | 21/28  | 1.36[0.74-2.50] |
| G5251-Pharmaceutical, Cosmetic and Toiletry Retailing  | 6/7    | 1.32[0.43-4.08] |
| G5259-Retailing nec                                    | 12/6   | 3.7[1.33-10.24] |
| G526-Household Equipment Repair Services               | 6/6    | 1.59[0.49-5.18] |
| G53-Motor Vehicle Retailing and Services               | 47/48  | 1.78[1.14-2.78] |
| G531-Motor Vehicle Retailing                           | 18/9   | 3.73[1.62-8.60] |
| G5311-Car Retailing                                    | 13/9   | 2.47[1.02-6.00] |
| G532-Motor Vehicle Services                            | 37/39  | 1.62[0.99-2.65] |
| G5321-Automotive Fuel Retailing                        | 19/9   | 4.10[1.72-9.78] |
| G5329-Automotive Repair and Services nec               | 17/25  | 1.07[0.55-2.07] |
| <b>H-Accommodation, Cafes and Restaurants</b>          | 48/81  | 1.13[0.75-1.71] |
| H57-Accommodation, Cafes and Restaurants               | 48/81  | 1.13[0.75-1.71] |
| H571-Accommodation                                     | 34/44  | 1.51[0.92-2.49] |
| H5710-Accommodation                                    | 34/44  | 1.51[0.92-2.49] |
| H572-Pubs, Taverns and Bars                            | 6/6    | 1.55[0.48-5.02] |
| H573-Cafes and Restaurants                             | 12/38  | 0.59[0.29-1.17] |
| H5730-Cafes and Restaurants                            | 8/9    | 1.68[0.61-4.62] |
| <b>I-Transport and Storage</b>                         | 58/88  | 1.20[0.82-1.76] |
| I61-Road Transport                                     | 17/38  | 0.74[0.39-1.38] |
| I611-Road Freight Transport                            | 10/31  | 0.54[0.25-1.16] |
| I6110-Road Freight Transport                           | 4/9    | 0.92[0.26-3.30] |
| I612-Road Passenger Transport                          | 7/11   | 0.98[0.37-2.63] |
| I6122-Short Distance Bus Transport (including Tramway) | 3/7    | 0.70[0.17-2.83] |
| I62-Rail Transport                                     | 17/12  | 2.34[1.09-5.06] |
| I620-Rail Transport                                    | 12/6   | 3.19[1.16-8.79] |
| I6200-Rail Transport                                   | 9/6    | 2.27[0.78-6.62] |
| I63-Water Transport                                    | 8/11   | 1.72[0.64-4.62] |
| I630-Water Transport                                   | 8/11   | 1.72[0.64-4.62] |
| I6301-International Sea Transport                      | 3/8    | 0.87[0.21-3.56] |
| I64-Air and Space Transport                            | 4/11   | 0.64[0.20-2.08] |
| I640-Air and Space Transport                           | 4/9    | 0.82[0.24-2.74] |
| I66-Services to Transport                              | 15/20  | 1.39[0.69-2.81] |
| I662-Services to Water Transport                       | 4/11   | 0.71[0.22-2.30] |
| I664-Other Services to Transport                       | 7/8    | 1.51[0.52-4.34] |
| I6641-Travel Agency Services                           | 6/6    | 1.66[0.51-5.36] |
| <b>J-Communication Services</b>                        | 33/47  | 1.43[0.88-2.32] |
| J71-Communication Services                             | 33/47  | 1.43[0.88-2.32] |
| J711-Postal and Courier Services                       | 25/35  | 1.47[0.85-2.56] |
| J7111-Postal Services                                  | 19/31  | 1.25[0.68-2.29] |
| J712-Telecommunication Services                        | 10/17  | 1.12[0.49-2.55] |
| J7120-Telecommunication Services                       | 7/6    | 2.44[0.78-7.61] |
| <b>K-Finance and Insurance</b>                         | 32/78  | 0.79[0.50-1.24] |
| K73-Finance                                            | 20/41  | 0.97[0.55-1.72] |
| K732-Deposit Taking Financiers                         | 14/35  | 0.82[0.42-1.57] |
| K7321-Banks                                            | 14/34  | 0.85[0.44-1.65] |
| K74-Insurance                                          | 13/27  | 1.02[0.51-2.05] |
| K742-Other Insurance                                   | 10/27  | 0.78[0.37-1.67] |
| K7422-General Insurance                                | 9/27   | 0.70[0.32-1.54] |
| K75-Services to Finance and Insurance                  | 8/17   | 0.80[0.34-1.92] |
| K751-Services to Finance and Investment                | 8/11   | 1.22[0.47-3.15] |
| K7519-Services to Finance and Investment nec           | 6/11   | 0.92[0.33-2.57] |
| <b>L-Property and Business Services</b>                | 84/174 | 0.86[0.62-1.18] |
| L77-Property Services                                  | 16/40  | 0.70[0.38-1.29] |
| L771-Property Operators and Developers                 | 8/13   | 1.08[0.43-2.67] |
| L7712-Commercial Property Operators and Developers     | 3/9    | 0.58[0.15-2.21] |



|                                                           |        |                  |
|-----------------------------------------------------------|--------|------------------|
| L772-Real Estate Agents                                   | 7/20   | 0.67[0.27-1.62]  |
| L774-Machinery and Equipment Hiring and Leasing           | 2/9    | 0.32[0.07-1.51]  |
| L78-Business Services                                     | 73/146 | 0.92[0.66-1.29]  |
| L781-Scientific Research                                  | 10/14  | 1.48[0.62-3.49]  |
| L782-Technical Services                                   | 18/31  | 1.04[0.56-1.92]  |
| L7821-Architectural Services                              | 6/5    | 2.76[0.80-9.51]  |
| L7823-Consultant Engineering Services                     | 9/15   | 1.02[0.43-2.41]  |
| L7829-Technical Services nec                              | 3/9    | 0.51[0.13-2.00]  |
| L783-Computer Services                                    | 13/11  | 2.00[0.86-4.62]  |
| L7834-Computer Consultancy Services                       | 11/8   | 2.39[0.92-6.15]  |
| L784-Legal and Accounting Services                        | 16/46  | 0.66[0.36-1.21]  |
| L7841-Legal Services                                      | 6/20   | 0.62[0.24-1.59]  |
| L7842-Accounting Services                                 | 10/28  | 0.65[0.31-1.39]  |
| L785-Marketing and Business Management Services           | 7/27   | 0.49[0.21-1.16]  |
| L7851-Advertising Services                                | 2/11   | 0.34[0.07-1.58]  |
| L7855-Business Management Services                        | 2/11   | 0.35[0.08-1.64]  |
| L786-Other Business Services                              | 21/42  | 1.00[0.56-1.76]  |
| L7861-Employment Placement Services                       | 4/8    | 1.03[0.30-3.61]  |
| L7864-Security and Investigative Services (except Police) | 7/5    | 2.32[0.70-7.71]  |
| L7866-Cleaning Services                                   | 5/14   | 0.70[0.24-2.07]  |
| L7869-Business Services nec                               | 2/10   | 0.42[0.09-2.03]  |
| <b>M-Government Administration and Defence</b>            | 81/148 | 1.06[0.77-1.46]  |
| M81-Government Administration                             | 61/120 | 0.99[0.70-1.42]  |
| M811-Government Administration                            | 56/117 | 0.92[0.64-1.33]  |
| M8111-Central Government Administration                   | 37/73  | 0.99[0.64-1.54]  |
| M8113-Local Government Administration                     | 17/52  | 0.61[0.34-1.09]  |
| M82-Defence                                               | 25/35  | 1.36[0.78-2.37]  |
| M820-Defence                                              | 25/35  | 1.36[0.78-2.37]  |
| M8200-Defence                                             | 25/35  | 1.36[0.78-2.37]  |
| <b>N-Education</b>                                        | 61/160 | 0.75[0.52-1.10]  |
| N84-Education                                             | 61/160 | 0.75[0.52-1.10]  |
| N841-Preschool Education                                  | 4/8    | 1.03[0.30-3.58]  |
| N842-School Education                                     | 36/102 | 0.75[0.48-1.16]  |
| N8421-Primary Education                                   | 20/52  | 0.87[0.50-1.54]  |
| N8422-Secondary Education                                 | 14/44  | 0.71[0.37-1.36]  |
| N8423-Combined Primary and Secondary Education            | 2/17   | 0.27[0.06-1.19]  |
| N843-Post School Education                                | 23/44  | 1.11[0.63-1.94]  |
| N8431-Higher Education                                    | 13/37  | 0.72[0.36-1.42]  |
| N8432-Technical and Further Education                     | 9/9    | 2.17[0.83-5.71]  |
| N844-Other Education                                      | 11/45  | 0.51[0.25-1.02]  |
| N8440-Other Education                                     | 5/5    | 2.56[0.72-9.16]  |
| <b>O-Health and Community Services</b>                    | 63/139 | 0.96[0.66-1.39]  |
| O86-Health Services                                       | 46/108 | 0.92[0.61-1.39]  |
| O861-Hospitals and Nursing Homes                          | 27/73  | 0.79[0.48-1.29]  |
| O8611-Hospitals (except Psychiatric Hospitals)            | 26/69  | 0.81[0.49-1.33]  |
| O862-Medical and Dental Services                          | 9/32   | 0.61[0.28-1.33]  |
| O8621-General Practice Medical Services                   | 5/19   | 0.54[0.19-1.51]  |
| O8623-Dental Services                                     | 2/12   | 0.40[0.09-1.83]  |
| O863-Other Health Services                                | 14/25  | 1.18[0.59-2.38]  |
| O8639-Health Services nec                                 | 12/17  | 1.67[0.76-3.66]  |
| O87-Community Services                                    | 28/51  | 1.25[0.74-2.11]  |
| O871-Child Care Services                                  | 5/13   | 0.97[0.33-2.87]  |
| O872-Community Care Services                              | 24/37  | 1.47[0.83-2.61]  |
| O8721-Accommodation for the Aged                          | 6/18   | 0.69[0.26-1.81]  |
| O8722-Residential Care Services nec                       | 11/15  | 1.47[0.64-3.36]  |
| O8729-Non-Residential Care Services nec                   | 7/6    | 3.49[1.09-11.22] |
| <b>P-Cultural and Recreational Services</b>               | 35/56  | 1.23[0.77-1.95]  |
| P91-Motion Picture, Radio and Television Services         | 5/7    | 1.52[0.47-4.97]  |
| P92-Libraries, Museums and the Arts                       | 13/25  | 1.07[0.53-2.19]  |
| P921-Libraries                                            | 6/9    | 1.95[0.66-5.78]  |
| P924-Arts                                                 | 5/10   | 0.92[0.30-2.81]  |
| P9242-Creative Arts                                       | 2/9    | 0.40[0.08-1.90]  |
| P93-Sport and Recreation                                  | 19/27  | 1.25[0.67-2.33]  |

|                                         |       |                 |
|-----------------------------------------|-------|-----------------|
| P931-Sport                              | 11/14 | 1.32[0.58-3.01] |
| P9312-Sports Grounds and Facilities nec | 5/7   | 1.24[0.38-4.08] |
| P933-Other Recreation Services          | 7/9   | 1.50[0.53-4.23] |
| <b>Q-Personal and Other Services</b>    | 49/68 | 1.32[0.88-2.00] |
| Q95-Personal Services                   | 19/30 | 1.08[0.59-2.00] |
| Q952-Other Personal Services            | 19/29 | 1.13[0.61-2.10] |
| Q9521-Laundries and Dry-Cleaners        | 3/9   | 0.59[0.16-2.26] |
| Q9525-Gardening Services                | 6/10  | 0.88[0.31-2.51] |
| Q9526-Hairdressing and Beauty Salons    | 4/9   | 0.80[0.23-2.76] |
| Q96-Other Services                      | 29/39 | 1.37[0.82-2.30] |
| Q961-Religious Organisations            | 7/11  | 1.48[0.55-4.01] |
| Q962-Interest Groups                    | 13/13 | 1.92[0.85-4.32] |
| Q9629-Interest Groups nec               | 7/6   | 1.87[0.61-5.78] |
| Q963-Public Order and Safety Services   | 11/16 | 1.04[0.47-2.33] |
| Q9631-Police Services                   | 7/8   | 1.58[0.55-4.52] |

---

OR adjusted for Age, Sex, Ethnicity, Highest Education Level, Socioeconomic Deprivation Status and Smoking.

Results were based on at least 10 subjects ( cases + controls).

"Response outside scope" was used for responses, such as 'housewife', 'pensioner' or 'student', which are not covered by NZSCO99.



**Supplementary Tables S4. Odds Ratios (OR) and 95% CIs for Occupations adjusted by interview methods**

| Occupation                                          | N(Cases/Controls) | Never/Ever        |                   |
|-----------------------------------------------------|-------------------|-------------------|-------------------|
|                                                     |                   | OR1               | OR2               |
| <b>1-Legislators, Administrators and Managers</b>   | 84/169            | 0.83[0.60-1.14]   | 0.78[0.54-1.13]   |
| <b>2-Professionals</b>                              | 109/254           | 0.75[0.54-1.05]   | 0.82[0.56-1.21]   |
| <b>3-Technicians and Associate Professionals</b>    | 103/197           | 0.97[0.72-1.32]   | 0.92[0.65-1.30]   |
| 31141-Telecommunications Technician                 | 8/4               | 4.20[1.20-14.64]* | 3.75[0.89-15.74]  |
| 3118-Draughting Technicians                         | 9/7               | 3.02[1.07-8.53]*  | 2.65[0.84-8.38]   |
| 3342- Education Associate Professionals             | 2/20              | 0.23[0.05-1.00]*  | 0.26[0.05-1.26]   |
| <b>4-Clerks</b>                                     | 90/238            | 0.62[0.45-0.86]*  | 0.67[0.46-0.96]*  |
| <b>5-Service and Sales Workers</b>                  | 130/205           | 1.40[1.04-1.90]*  | 1.27[0.90-1.79]   |
| 51-Personal and Protective Services Workers         | 89/131            | 1.46[1.04-2.04]*  | 1.47[1.00-2.16]   |
| 52113-Forecourt Attendant                           | 11/2              | 8.31[1.79-38.54]* | 7.05[1.32-37.61]* |
| <b>6-Agriculture and Fishery Workers</b>            | 106/144           | 1.66[1.21-2.29]*  | 1.56[1.08-2.26]*  |
| 61-Market Oriented Agricultural and Fishery Workers | 106/144           | 1.66[1.21-2.29]*  | 1.56[1.08-2.26]*  |
| 611-Market Farmers and Crop Growers                 | 47/46             | 2.15[1.37-3.38]*  | 2.04[1.23-3.39]*  |
| 6111-Field Crop and Vegetable Growers               | 11/8              | 2.93[1.10-7.77]*  | 1.98[0.67-5.89]   |
| 61112-Market Gardener and Related Worker            | 8/4               | 3.98[1.14-13.88]* | 2.47[0.60-10.17]  |
| 6112-Fruit Growers                                  | 23/24             | 2.03[1.09-3.78]*  | 2.41[1.19-4.89]*  |
| 61121-Fruit Grower, Worker                          | 20/21             | 2.07[1.07-4.02]*  | 2.17[1.01-4.66]*  |
| 6113-Gardeners and Nursery Growers                  | 20/19             | 1.96[1.01-3.82]*  | 1.75[0.84-3.64]   |
| 61133-Grounds or Green Keeper                       | 12/7              | 3.01[1.14-7.96]*  | 2.70[0.91-7.96]   |
| 6125-Crop and Livestock Producers                   | 14/10             | 3.61[1.44-9.02]*  | 4.88[1.73-13.78]* |
| 614-Fishery Workers, Hunters and Trappers           | 7/3               | 5.62[1.27-24.97]* | 3.09[0.52-18.23]  |
| <b>7-Trades Workers</b>                             | 93/128            | 1.28[0.89-1.83]   | 1.13[0.75-1.69]   |
| 71-Building Trades Workers                          | 57/49             | 2.02[1.30-3.14]*  | 2.03[1.21-3.38]*  |
| 711-Building Frame and Related Trades Workers       | 33/27             | 1.93[1.10-3.39]*  | 1.68[0.88-3.22]   |
| 7112-Carpenters and Joiners                         | 32/25             | 1.97[1.11-3.48]*  | 1.82[0.94-3.54]   |
| 71122-Builder (Including Contractor)                | 23/13             | 2.90[1.41-5.96]*  | 2.92[1.28-6.68]*  |
| 71311-Electrician                                   | 14/6              | 3.61[1.34-9.74]*  | 3.74[1.16-12.02]* |
| <b>8-Plant and Machine Operators and Assemblers</b> | 92/120            | 1.42[1.01-2.01]*  | 1.29[0.87-1.92]   |
| <b>9-Elementary Occupations (incl Residuals)</b>    | 80/111            | 1.44[1.01-2.04]*  | 1.35[0.90-2.02]   |
| 9151-Labourers                                      | 48/55             | 1.61[1.03-2.52]*  | 1.39[0.83-2.34]   |

OR1 adjusted for Age, Sex, Ethnicity, Highest Education Level, Socioeconomic Deprivation Status and Smoking.

OR2 adjusted for Age, Sex, Ethnicity, Highest Education Level, Socioeconomic Deprivation Status, Smoking and Interview Method.

The table includes results for all broad occupation categories (1-digit), and for specific occupations (2-5 digits) if the association for ever vs. never employed was statistically significant (p<0.05).

Results were based on at least 10 subjects ( cases + controls).

\*p<0.05

Supplementary Table S5. Urban/Rural residence (as recorded on the Electoral Roll) for participants and non-participants

|                    | All study subject |       |                   |       | P   | Participants  |     |                  |    | P     | Non-Participants |       |                   |       | P    | Controls             |  |                           |  |
|--------------------|-------------------|-------|-------------------|-------|-----|---------------|-----|------------------|----|-------|------------------|-------|-------------------|-------|------|----------------------|--|---------------------------|--|
|                    | Cases (N=396)     |       | Controls (N=2400) |       |     | Cases (N=321) |     | Controls (N=605) |    |       | Cases (N=75)     |       | Controls (N=1795) |       |      | Participants (N=605) |  | Non-Participants (N=1795) |  |
| Urban/Rural living | N                 | %     | N                 | %     | N   | %             | N   | %                | N  | %     | N                | %     | N                 | %     | N    | %                    |  |                           |  |
| Urban              | 334               | 84.34 | 2043              | 85.12 | 269 | 83.80         | 495 | 81.82            | 65 | 86.67 | 1548             | 86.24 | 495               | 81.82 | 1548 | 86.24                |  |                           |  |
| Rural              | 62                | 15.66 | 357               | 14.88 | 52  | 16.20         | 110 | 18.18            | 10 | 13.33 | 247              | 13.76 | 110               | 18.18 | 247  | 13.76                |  |                           |  |

Urban area including: main urban area, secondary urban area and minor urban area  
Rural area including: rural central and rural including offshore islands

- main urban area – city or major centre with a population of > 30,000
- secondary urban area – larger regional centres with a population of 10,000-29,999
- minor urban area – urbanized settlement centred around a smaller town with a population of 1,000 – 9,999
- rural central – an area outside the urban centres (described above) which does not incorporate coastal areas and off-shore islands
- rural including offshore islands -an area outside the urban centres (described above) which incorporates coastal areas and off-shore islands by Statistics New Zealand. *Geographic definitions*.

**Supplementary Table S6. Occupation (as recorded on the Electoral Roll) for participating and non-participating Controls**

| <b>Occupation</b>                                               | <b>Non-Participants Controls</b> |          | <b>Participants Controls</b> |          | <b>P</b>         |
|-----------------------------------------------------------------|----------------------------------|----------|------------------------------|----------|------------------|
| <b>Occupation-1 Digit</b>                                       | <b>(N=1795)</b>                  | <b>%</b> | <b>(N=605)</b>               | <b>%</b> | <b>&lt;.0001</b> |
| 0-Response Outside Scope                                        | 874                              | 48.69    | 246                          | 40.66    |                  |
| 1-Legislators, Administrators and Managers                      | 118                              | 6.57     | 51                           | 8.43     |                  |
| 2-Professionals                                                 | 135                              | 7.52     | 109                          | 18.02    |                  |
| 3-Technicians and Associate Professionals                       | 85                               | 4.74     | 40                           | 6.61     |                  |
| 4-Clerks                                                        | 63                               | 3.51     | 27                           | 4.46     |                  |
| 5-Service and Sales Workers                                     | 87                               | 4.85     | 22                           | 3.64     |                  |
| 6-Agriculture and Fishery Workers                               | 77                               | 4.29     | 28                           | 4.63     |                  |
| 7-Trades Workers                                                | 101                              | 5.63     | 23                           | 3.80     |                  |
| 8-Plant and Machine Operators and Assemblers                    | 56                               | 3.12     | 20                           | 3.31     |                  |
| 9-Elementary Occupations (incl Residuals)                       | 199                              | 11.08    | 39                           | 6.44     |                  |
| <b>Occupation-2 Digit</b>                                       | <b>(N=1795)</b>                  | <b>%</b> | <b>(N=605)</b>               | <b>%</b> | <b>&lt;.0001</b> |
| 00-Response Outside Scope                                       | 874                              | 48.69    | 246                          | 40.66    |                  |
| 11-Legislators and Administrators                               | 6                                | 0.33     | 2                            | 0.33     |                  |
| 12-Corporate Managers                                           | 112                              | 6.24     | 49                           | 8.10     |                  |
| 21-Physical, Mathematical and Engineering Science Professionals | 42                               | 2.34     | 23                           | 3.80     |                  |
| 22-Life Science and Health Professionals                        | 21                               | 1.17     | 19                           | 3.14     |                  |
| 23-Teaching Professionals                                       | 29                               | 1.61     | 37                           | 6.11     |                  |
| 24-Other Professionals                                          | 43                               | 2.40     | 30                           | 4.95     |                  |
| 31-Physical Science and Engineering Associate Professionals     | 31                               | 1.73     | 9                            | 1.49     |                  |
| 32-Life Science and Health Associate Professionals              | 3                                | 0.17     | 3                            | 0.50     |                  |
| 33-Other Associate Professionals                                | 51                               | 2.84     | 28                           | 4.63     |                  |
| 41-Office Clerks                                                | 53                               | 2.95     | 23                           | 3.80     |                  |
| 42-Customer Services Clerks                                     | 10                               | 0.56     | 4                            | 0.66     |                  |
| 51-Personal and Protective Services Workers                     | 50                               | 2.79     | 11                           | 1.82     |                  |
| 52-Salespersons, Demonstrators and Models                       | 37                               | 2.06     | 11                           | 1.82     |                  |
| 61-Market Oriented Agricultural and Fishery Workers             | 77                               | 4.29     | 28                           | 4.63     |                  |
| 71-Building Trades Workers                                      | 59                               | 3.29     | 16                           | 2.64     |                  |
| 72-Metal and Machinery Trades Workers                           | 28                               | 1.56     | 4                            | 0.66     |                  |
| 73-Precision Trades Workers                                     | 3                                | 0.17     | 1                            | 0.17     |                  |
| 74-Other Craft and Related Trades Workers                       | 11                               | 0.61     | 2                            | 0.33     |                  |
| 81-Industrial Plant Operators                                   | 4                                | 0.22     | 2                            | 0.33     |                  |
| 82-Stationary Machine Operators and Assemblers                  | 20                               | 1.11     | 9                            | 1.49     |                  |
| 83-Drivers and Mobile Machinery Operators                       | 27                               | 1.50     | 7                            | 1.16     |                  |
| 84-Building and Related Workers                                 | 5                                | 0.28     | 2                            | 0.33     |                  |
| 91-Labourers and Related Elementary Service Workers             | 49                               | 2.73     | 9                            | 1.49     |                  |
| 97-Response Unidentifiable                                      | 22                               | 1.23     | 0                            | 0        |                  |
| 99-Not Stated                                                   | 128                              | 7.13     | 30                           | 4.96     |                  |

"Response outside scope" was used for responses, such as 'housewife', 'pensioner' or 'student', which are not covered by NZSCO99.

**Supplementary Table S7. Odds Ratios (OR) and 95% CIs for Occupation Stratified by Gender**

| Occupational Title                                  | Male(Cases/Controls) (n) | OR (95% CI)       | Female(Cases/Controls) (n) | OR (95% CI)       |
|-----------------------------------------------------|--------------------------|-------------------|----------------------------|-------------------|
| 1-Legislators, Administrators and Managers          | 54/111                   | 0.61[0.40-0.93]*  | 30/58                      | 1.26[0.73-2.15]   |
| 1222-Finance and Administration Managers            | 9/31                     | 0.44[0.20-0.98]*  | 8/4                        | 4.98[1.38-17.99]* |
| 2-Professionals                                     | 52/120                   | 0.54[0.33-0.88]*  | 57/134                     | 0.98[0.59-1.63]   |
| 2411-Accountants                                    | 3/19                     | 0.25[0.07-0.90]*  | 5/11                       | 0.93[0.30-2.89]   |
| 3-Technicians and Associate Professionals           | 67/105                   | 1.13[0.76-1.67]   | 36/92                      | 0.77[0.47-1.28]   |
| 311-Physical Science and Engineering Technicians    | 23/25                    | 1.98[1.05-3.77]*  | 5/10                       | 1.26[0.40-3.95]   |
| 4-Clerks                                            | 32/83                    | 0.57[0.35-0.91]*  | 58/155                     | 0.70[0.43-1.12]   |
| 41443-General Clerk                                 | 14/46                    | 0.49[0.26-0.94]*  | 19/75                      | 0.44[0.24-0.80]*  |
| 5-Service and Sales Workers                         | 67/77                    | 1.52[1.01-2.30]*  | 63/128                     | 1.26[0.78-2.04]   |
| 51316-Care Giver                                    | 0/2                      | -                 | 11/11                      | 2.65[1.04-6.79]*  |
| 52113-Forecourt Attendant                           | 9/2                      | 6.21[1.28-30.10]* | 2/0                        | -                 |
| 6-Agriculture and Fishery Workers                   | 76/96                    | 1.65[1.10-2.47]*  | 30/48                      | 1.67[0.95-2.96]   |
| 61-Market Oriented Agricultural and Fishery Workers | 76/96                    | 1.65[1.10-2.47]*  | 30/48                      | 1.67[0.95-2.96]   |
| 611-Market Farmers and Crop Growers                 | 32/23                    | 2.64[1.46-4.78]*  | 15/23                      | 1.76[0.82-3.77]   |
| 6112-Fruit Growers                                  | 15/9                     | 2.99[1.24-7.16]*  | 8/15                       | 1.45[0.55-3.85]   |
| 61121-Fruit Grower, Worker                          | 13/9                     | 2.68[1.09-6.58]*  | 7/12                       | 1.62[0.56-4.70]   |
| 7-Trades Workers                                    | 84/116                   | 1.19[0.79-1.77]   | 9/12                       | 1.86[0.73-4.76]   |
| 71-Building Trades Workers                          | 53/48                    | 1.85[1.15-2.96]*  | 4/1                        | -                 |
| 71122-Builder (Including Contractor)                | 21/13                    | 2.65[1.25-5.62]*  | 2/0                        | -                 |
| 71311-Electrician                                   | 14/6                     | 3.61[1.31-9.96]*  | 0/0                        | -                 |
| 8-Plant and Machine Operators and Assemblers        | 78/94                    | 1.50[1.00-2.25]   | 14/26                      | 1.33[0.63-2.80]   |
| 9-Elementary Occupations (incl Residuals)           | 57/70                    | 1.47[0.95-2.27]   | 23/41                      | 1.50[0.80-2.82]   |

OR adjusted for Age, Ethnicity, Highest Education Level, Socioeconomic Deprivation Status and Smoking.

The table includes results for all broad occupation categories (1-digit), and for specific occupations (2-5 digits) if the association for ever vs. never employed was statistically significant ( $p < 0.05$ ).

Results are based on at least 10 subjects (cases + controls)

\* $p < 0.05$

**Supplementary Table S8. Odds Ratios (OR) and 95% CIs for Industry Stratified by Gender**

| Industry Title                           | Male (Case/Controls) (n) | OR (95% CI)       | Female (Case/Controls) (n) | OR (95% CI)       |
|------------------------------------------|--------------------------|-------------------|----------------------------|-------------------|
| A-Agriculture, Forestry and Fishing      | 69/98                    | 1.30[0.87-1.96]   | 32/51                      | 1.61[0.92-2.81]   |
| A01-Agriculture                          | 61/78                    | 1.56[1.02-2.40]*  | 31/45                      | 1.89[1.07-3.34]*  |
| A011-Horticulture and Fruit Growing      | 19/17                    | 2.06[1.02-4.16]*  | 17/23                      | 2.08[0.99-4.39]   |
| A0119-Fruit Growing nec                  | 10/6                     | 2.95[1.02-8.52]*  | 10/7                       | 5.87[1.80-19.08]* |
| B-Mining                                 | 15/11                    | 2.43[1.05-5.58]*  | /                          | -                 |
| B14-Other Mining                         | 7/3                      | 5.53[1.36-22.51]* | /                          | -                 |
| C-Manufacturing                          | 93/143                   | 1.04[0.72-1.52]   | 38/94                      | 0.91[0.55-1.51]   |
| E-Construction                           | 74/86                    | 1.51[1.00-2.26]*  | 9/14                       | 1.84[0.74-4.56]   |
| E41-General Construction                 | 50/47                    | 1.83[1.14-2.94]*  | /                          | -                 |
| E412-Non-Building Construction           | 15/11                    | 2.42[1.04-5.61]*  | /                          | -                 |
| E4121-Road and Bridge Construction       | 11/6                     | 2.93[1.02-8.40]*  | /                          | -                 |
| F-Wholesale Trade                        | 23/52                    | 0.58[0.33-1.02]   | 9/27                       | 0.88[0.39-1.98]   |
| G-Retail Trade                           | 62/94                    | 1.02[0.68-1.53]   | 47/99                      | 1.07[0.66-1.75]   |
| G53-Motor Vehicle Retailing and Services | 34/38                    | 1.54[0.91-2.61]   | 13/10                      | 3.49[1.35-8.99]*  |
| G531-Motor Vehicle Retailing             | 12/6                     | 3.60[1.28-10.16]* | /                          | -                 |
| G5321-Automotive Fuel Retailing          | 13/7                     | 3.07[1.14-8.23]*  | /                          | -                 |
| I-Transport and Storage                  | 44/66                    | 1.17[0.74-1.84]   | 14/21                      | 1.43[0.68-3.03]   |
| L-Property and Business Services         | 47/87                    | 0.83[0.53-1.27]   | 37/85                      | 0.89[0.54-1.47]   |
| N-Education                              | 23/54                    | 0.83[0.47-1.48]   | 38/106                     | 0.74[0.44-1.26]   |
| O-Health and Community Services          | 15/31                    | 0.77[0.39-1.54]   | 47/108                     | 1.01[0.63-1.61]   |
| O8729-Non-Residential Care Services nec  | 1/0                      | -                 | 5/6                        | 3.76[1.07-13.26]* |
| P-Cultural and Recreational Services     | 22/20                    | 1.90[0.98-3.68]   | 13/36                      | 0.71[0.35-1.46]   |
| P93-Sport and Recreation                 | 14/8                     | 3.01[1.18-7.70]*  | 5/19                       | 0.44[0.15-1.29]   |
| P931-Sport                               | 10/4                     | 4.30[1.26-14.75]* | 1/10                       | 0.20[0.02-1.65]   |

OR adjusted for Age, Ethnicity, Highest Education Level, Socioeconomic Deprivation Status and Smoking.

The table includes results for all broad industry categories (1-digit), and for specific industries (2-5 digits) if the association for ever vs. never employed was statistically significant ( $p < 0.05$ ).

Results are based on at least 10 subjects (cases + controls)

\* $p < 0.05$
